# Supplementary material for: Long-Term Effects of Repeated Blast Exposure in United States Special Operations Forces Personnel: A Pilot Study Protocol
Source: PubMed Central journal article supplement — J Neurotrauma. 2022 Sep 29;39(19-20):1391–407. doi: 10.1089/neu.2022.0030 (PMC9529318; doi:10.1089/neu.2022.0030), 2022-09-29
Supplement: Suppl_FigS1.pdf [file Suppl_FigS1.pdf]

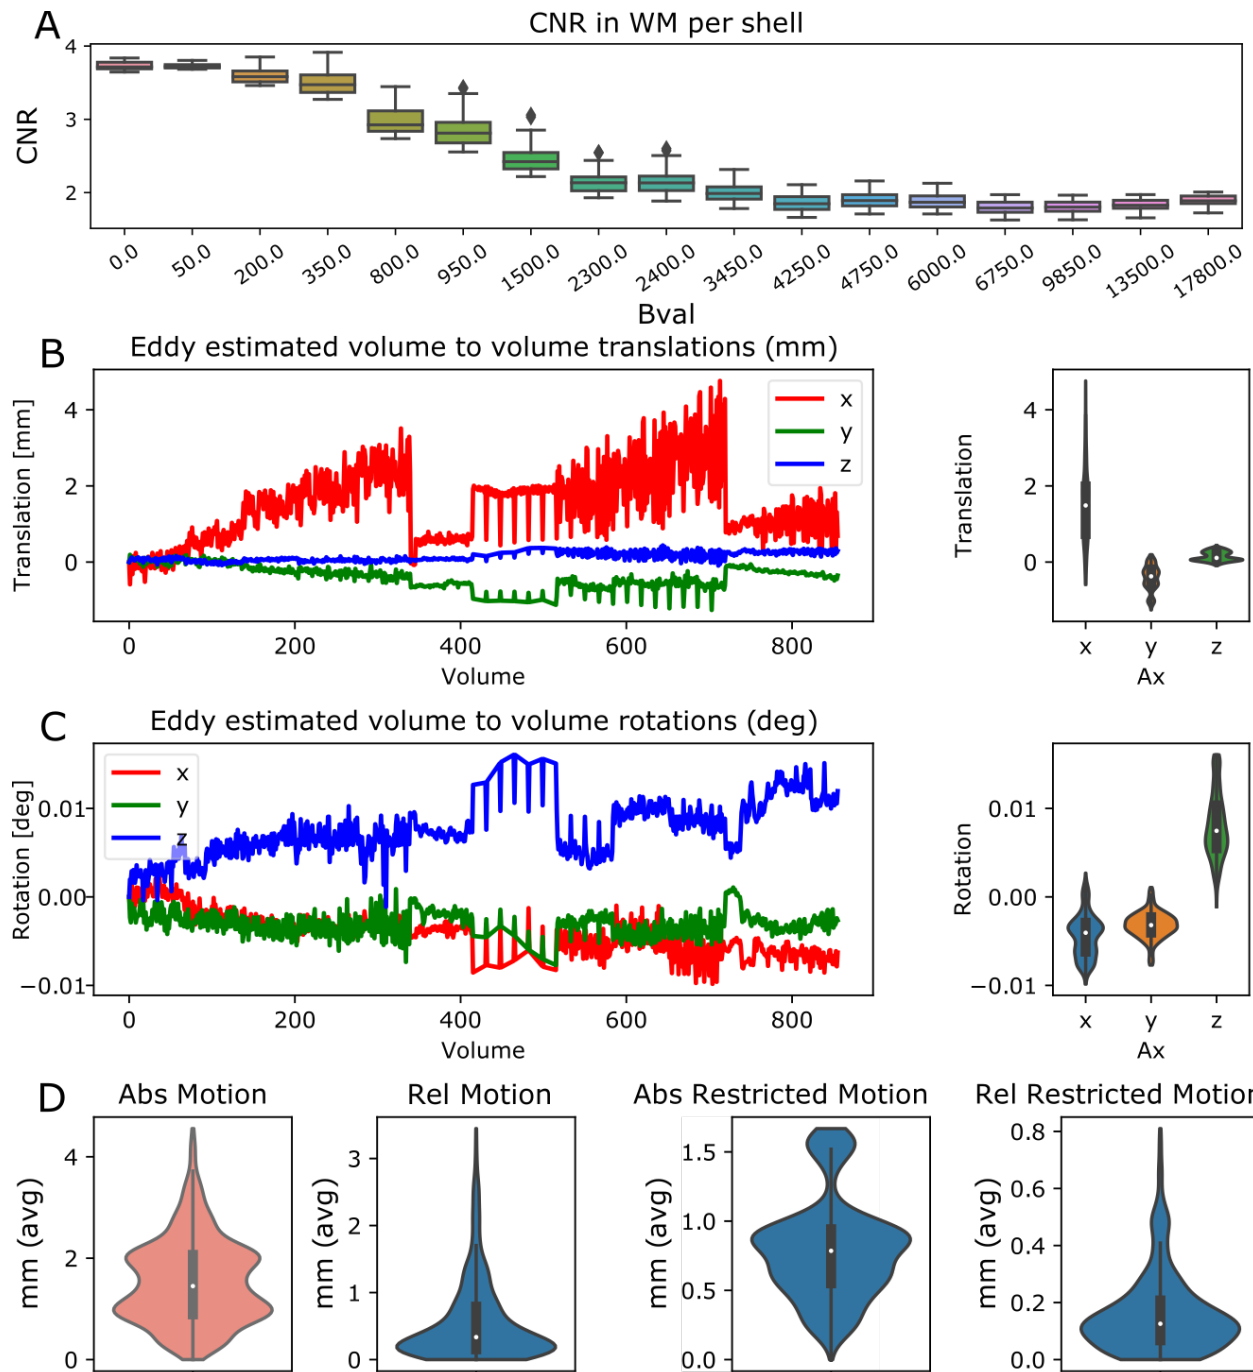

**Supplementary Figure 1: Quality Assessment of MRI Data.**

Example summary tables from a single subject quality assessment report for the Connectome MRI scan. A) Box plot showing the contrast-to-noise (CNR) ratio measured for each shell (b-value) inside a white matter (WM) mask. B) Estimated volume-to-volume translation (mm) time-course for each axis (left), and for overall volume-to-volume translation (mm) (Ax, right). C) Estimated volume-to-volume rotations (degrees; deg) for each axis (left), and for overall volume-to-volume rotation (mm) (right). D) Absolute (Abs; reference volume is the first volume), and relative (Rel; reference volume is the previous volume) overall displacement in average (avg) mm.
