# Supplementary material for: Long-Term Effects of Repeated Blast Exposure in United States Special Operations Forces Personnel: A Pilot Study Protocol
Source: PubMed Central journal article supplement — J Neurotrauma. 2022 Sep 29;39(19-20):1391–407. doi: 10.1089/neu.2022.0030 (PMC9529318; doi:10.1089/neu.2022.0030), 2022-09-29
Supplement: Suppl_FigS2.pdf [file Suppl_FigS2.pdf]

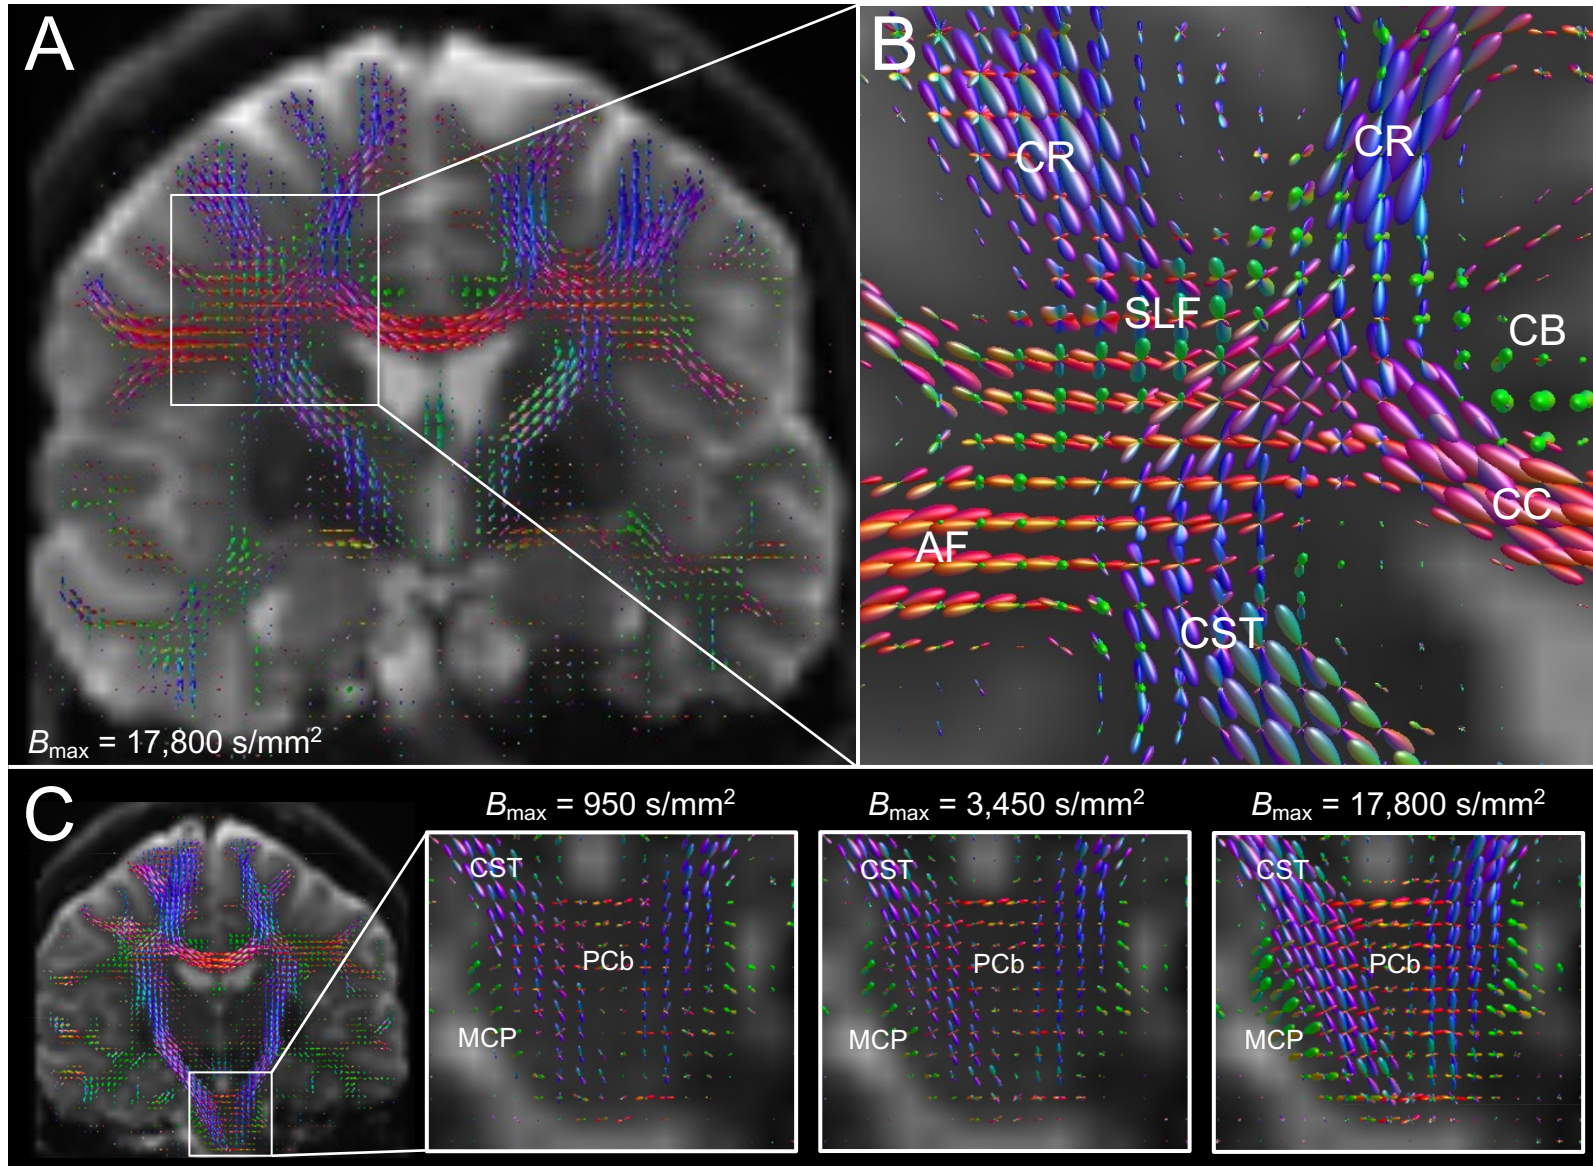

**Supplementary Figure 2: Fiber Orientation Distributions Functions from Connectome Diffusion MRI Data.** This figure shows representative diffusion MRI (dMRI) data acquired on the 3 Tesla Connectome scanner for one of the first ReBlast subjects. A) Coronal view of reconstructed fiber orientation distribution functions (fODFs) for  $b_{\max} = 17,800 \text{ s/mm}^2$ . B) Magnification box shown in A, indicating the location of white matter bundles that cross one another in this region. C) Comparison of fODFs for the region highlighted by the white box at different  $b_{\max}$  (95; 3,450; 17,800  $\text{s/mm}^2$ ). As the  $b_{\max}$  increases, we can better distinguish the three main fiber bundles present in this region (CST, MCP, PCb). The color of the fODFs encodes directionality: red = medial-lateral, green = anterior-posterior, blue = inferior-superior. Abbreviations: AF = arcuate fasciculus; CB = Cingulum bundle; CC = corpus callosum; CR = corona radiata; CST = cortico-spinal tract; MCP = middle cerebellar peduncle; PCb = ponto-cerebellar fibers; SLF = superior longitudinal fasciculus.
