# Supplementary material for: Long-Term Effects of Repeated Blast Exposure in United States Special Operations Forces Personnel: A Pilot Study Protocol
Source: PubMed Central journal article supplement — J Neurotrauma. 2022 Sep 29;39(19-20):1391–407. doi: 10.1089/neu.2022.0030 (PMC9529318; doi:10.1089/neu.2022.0030), 2022-09-29
Supplement: Suppl_FigS3.pdf [file Suppl_FigS3.pdf]

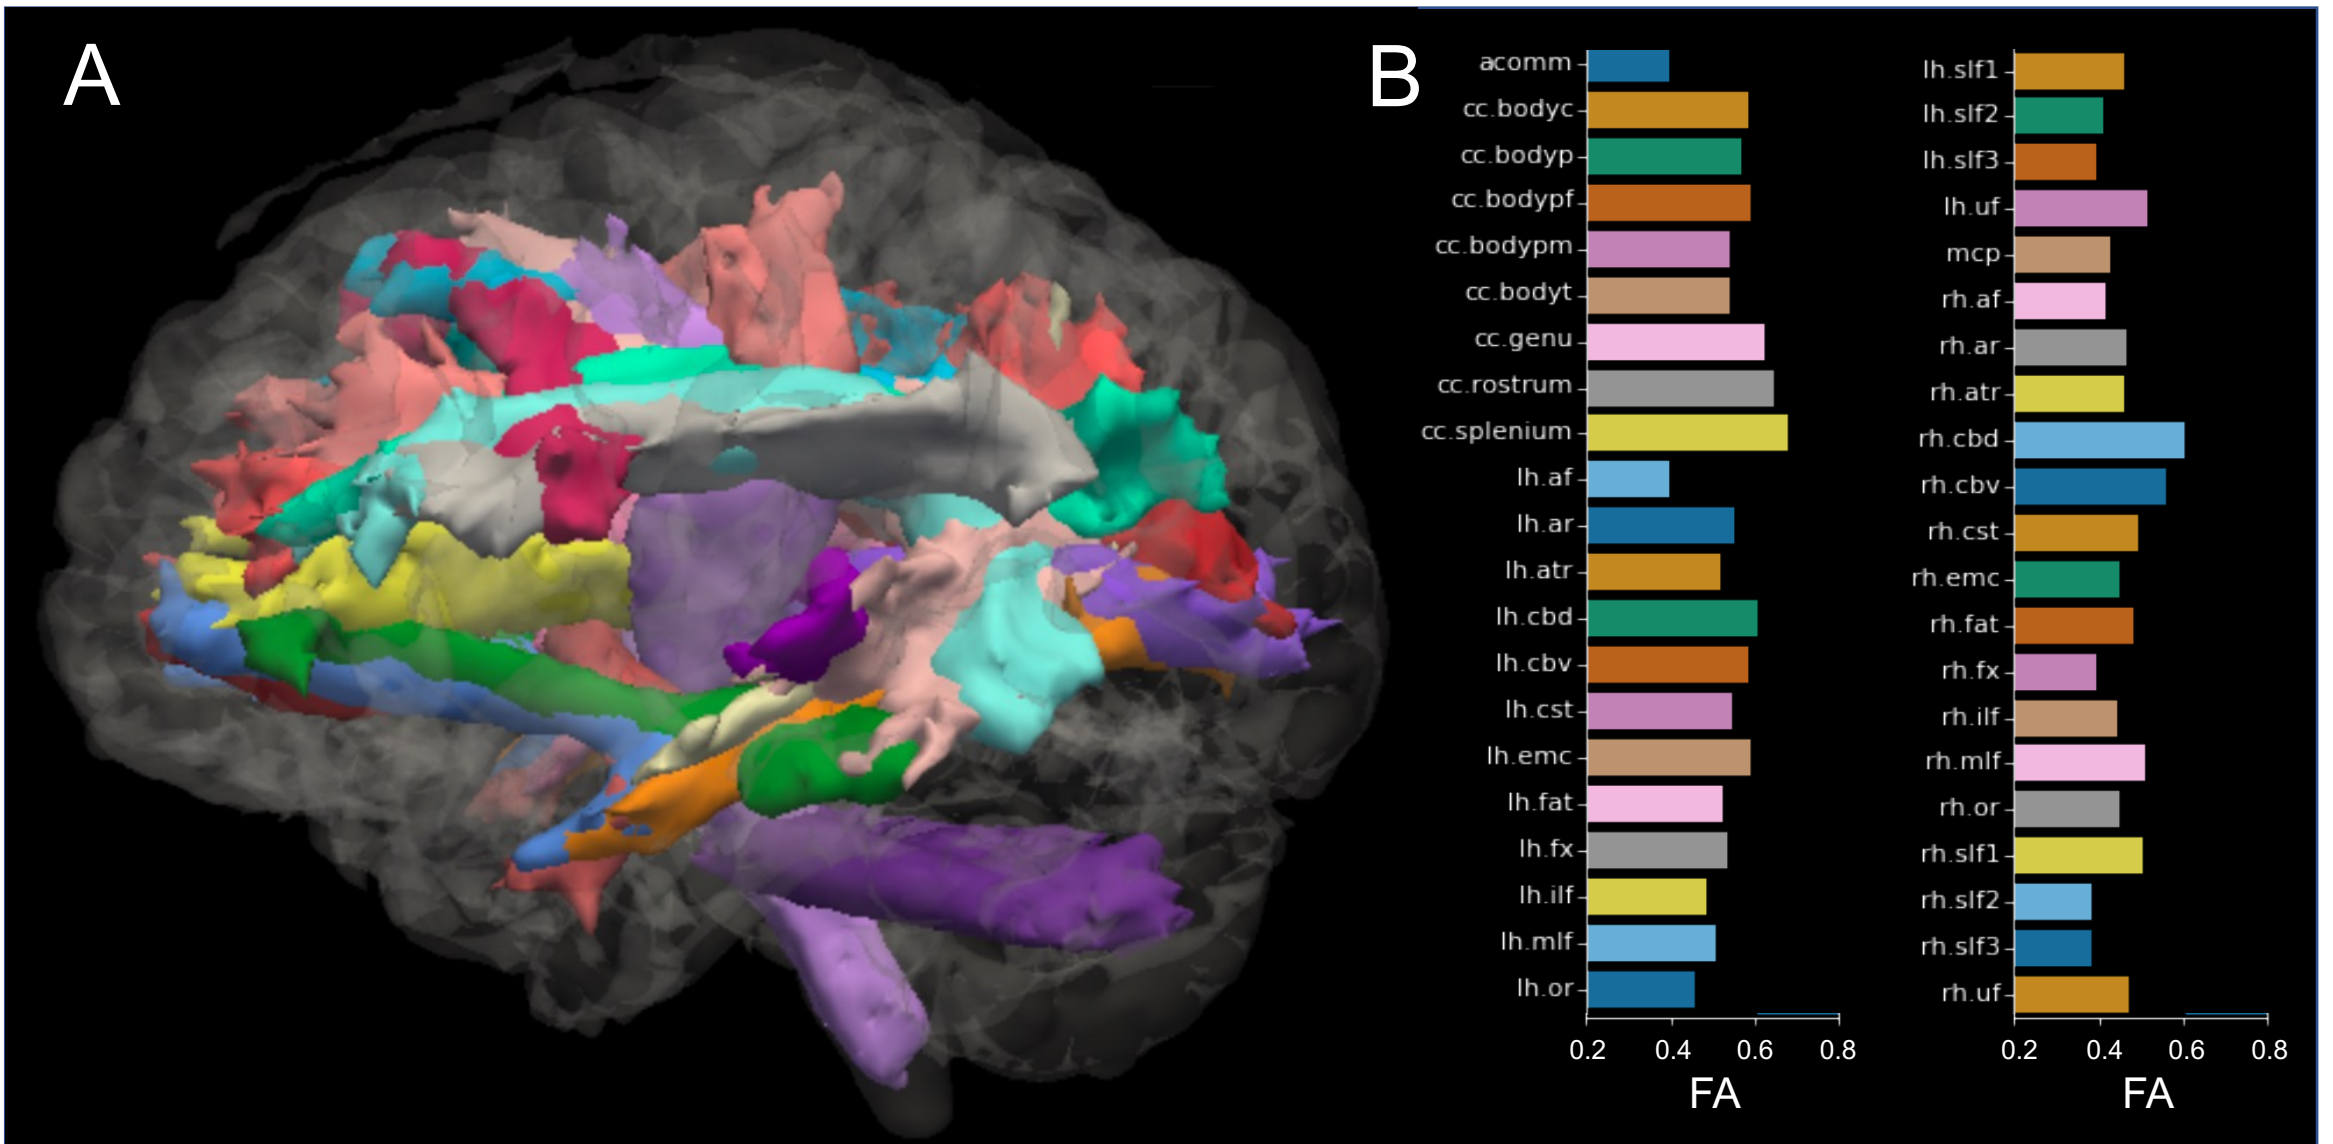

**Supplementary Figure 3: Automated Segmentation of 42 White Matter Bundles.** This figure shows representative diffusion MRI (dMRI) data acquired on the 3 Tesla Connectome scanner for one of the first ReBlast subjects. A) 3-dimensional lateral view of the 42 white matter bundles automatically reconstructed using TRActs Constrained by UnderLying Anatomy (TRACULA).<sup>19, 20</sup> B) Mean fractional anisotropy (FA) extracted from each of the 42 white matter bundles shown in A. Abbreviations: acomm = anterior commissure; atr = anterior thalamic radiation; af = arcuate fasciculus; ar = acoustic radiation; cb = cingulum bundle; cc = corpus callosum; cst = corticospinal tract; emc = extreme capsule; fat = frontal aslant tract; fx = fornix; lh = left hemisphere; mlf = middle longitudinal fasciculus; or = optic radiations; rh = right hemisphere; slf = superior longitudinal fasciculus; uf = uncinate fasciculus.
