# Supplementary material for: Long-Term Effects of Repeated Blast Exposure in United States Special Operations Forces Personnel: A Pilot Study Protocol
Source: PubMed Central journal article supplement — J Neurotrauma. 2022 Sep 29;39(19-20):1391–407. doi: 10.1089/neu.2022.0030 (PMC9529318; doi:10.1089/neu.2022.0030), 2022-09-29
Supplement: Suppl_TableS1.pdf [file Suppl_TableS1.pdf]

**Supplementary Table 1 – Neuroimaging Acquisition Parameters**

| Sequence                | Slices | FOV (mm) | Voxel size (mm) | TR/TE (ms)                 | Time (mm:ss) | Other Parameters & Comments                                                                                                                                                                                          |
|-------------------------|--------|----------|-----------------|----------------------------|--------------|----------------------------------------------------------------------------------------------------------------------------------------------------------------------------------------------------------------------|
| <b>3T CONNECTOM MRI</b> |        |          |                 |                            |              |                                                                                                                                                                                                                      |
| DWI                     | 66     | 220x220  | 2.0/2.0/2.0     | 3600/77                    | 21:24        | $\Delta = 49$ ms, $\delta = 8$ ms; $G = 142, 179, 216, 253, 290$ mT/m; $b = 4250, 6750, 9850, 13500, 17800$ s/mm <sup>2</sup> ; 64 DW directions; PE = P→A; FA = 90°; R = 2; MB =2; BWDTH = 2314 Hz/px, ES = 0.52 ms |
|                         |        |          |                 |                            | 7:08         | $\Delta = 49$ ms, $\delta = 8$ ms; $G = 200, 950, 2300$ mT/m; $b = 31, 68, 105$ s/mm <sup>2</sup> ; 32 directions, PE = A→P; FA = 90°; R = 2; MB =2; BWDTH = 2314 Hz/px, ES = 0.52 ms                                |
|                         |        |          |                 |                            | 17:20        | $\Delta = 19$ ms, $\delta = 8$ ms; $G = 179, 216, 253, 290$ mT/m, $b = 2400, 3450, 4750, 6000$ s/mm <sup>2</sup> ; 64 directions, PE = A→P; FA = 90°; R = 2; MB =2; BWDTH = 2314 Hz/px, ES = 0.52 ms                 |
|                         |        |          |                 |                            | 9:10         | $\Delta = 19$ ms, $\delta = 8$ ms; $G = 31, 68, 105, 142$ mT/m; $b = 50, 350, 800, 1500$ s/mm <sup>2</sup> ; 64 directions, PE = A→P; FA = 90°; R = 2; MB =2; BWDTH = 2314 Hz/px, ES = 0.52 ms                       |
| T <sub>1</sub> MEMPRAGE | 176    | 220x220  | 1.0/1.0/1.0     | 2530/1.15                  | 3:58         | 3D Multi-echo, FA = 7°; GRAPPA = 3; TI = 1100 ms; BWDTH = 649 Hz/px, ES = 9.2 ms                                                                                                                                     |
|                         |        |          |                 |                            | 3:58         |                                                                                                                                                                                                                      |
| <b>7T MRI</b>           |        |          |                 |                            |              |                                                                                                                                                                                                                      |
| BOLD rs-fMRI            | 111    | 192x192  | 1.2/1.2/1.2     | 2250/26                    | 6:37         | Single-shot SMS gradient-echo EPI with FLEET-ACS <sup>1</sup> and Blipped-CAIPI <sup>2</sup> ; PE = A→P; FLEET FA = 10°, FA = 75°; R = 3; MB = 3; BWDTH = 1644 Hz/px, ES = 0.71 ms                                   |
|                         |        |          |                 |                            | 6:37         |                                                                                                                                                                                                                      |
|                         |        |          |                 |                            | 6:37         |                                                                                                                                                                                                                      |
|                         |        |          |                 |                            | 6:37         |                                                                                                                                                                                                                      |
| T <sub>1</sub> MP2RAGE  | 192    | 256x256  | 1.0/1.0/1.0     | 4300/1.84                  | 8:50         | 3D Multi-inversion, A <sub>1</sub> = 5°, FA <sub>2</sub> = 6°; TI <sub>1</sub> = 840 ms, TI <sub>2</sub> = 2370 ms; R = 3; BWDTH = 250 Hz/px, ES = 5.8 ms, Non-selective water excitation, FOCI inversion pulse.     |
| SWI                     | 60     | 220x220  | 0.33/0.33/1     | 3690/21                    | 20:44        | 2D FLASH, PE = A→P; FA = 90°, Flow compensation, Phase stabilization, R = 2; BWDTH = 50 Hz/px                                                                                                                        |
| SWI                     | 60     | 220x220  | 0.33/0.33/1     | 3690/21                    | 20:44        |                                                                                                                                                                                                                      |
| <b>PET MRI</b>          |        |          |                 |                            |              |                                                                                                                                                                                                                      |
| TSPO PET <sup>a</sup>   | 153    | 320x320  | 1.25/1.25/1.25  | N.A.                       | ~60:00       |                                                                                                                                                                                                                      |
| MEMPRAGE                | 208    | 280x280  | 1.0/1.0/1.0     | 2530/1.66, 3.53, 5.4, 7.27 | 7:23         | 3D, FA = 7°; R = 2; BWDTH = 638 Hz/px, ES = 9.7 ms                                                                                                                                                                   |
| pCASL                   | 25     | 225x225  | 3.5/3.5/6.0     | 6000/11                    | 9:18         | FA = 90°; R = 2; BWDTH = 3004 Hz/px, ES = 0.43 ms, post-labeling delay = 1000 ms                                                                                                                                     |

|                      |         |         |                |                                  |        |                                                                                                                                            |
|----------------------|---------|---------|----------------|----------------------------------|--------|--------------------------------------------------------------------------------------------------------------------------------------------|
| TOF Angio            | 40/slab | 150x200 | 0.5/0.5/0.65   | 37/3.86                          | 18:43  | 3D Multi-slab, 7 slabs,<br>FA = 18°; BWDTH = 178 Hz/px                                                                                     |
| Tau PET <sup>a</sup> | 153     | 320x320 | 1.25/1.25/1.25 | N.A.                             | ~60:00 |                                                                                                                                            |
| MEMPRAGE             | 208     | 280x280 | 1.0/1.0/1.0    | 2530/1.66,<br>3.53, 5.4,<br>7.27 | 7:23   | 3D, FA = 7°; R = 2; BWDTH = 638 Hz/px, ES = 9.7 ms                                                                                         |
| MP2RAGE              | 176     | 240x256 | 1.0/1.0/1.0    | 5000/2.96                        | 8:22   | 3D, TI <sub>1</sub> = 700 ms, TI <sub>2</sub> = 2500 ms, FA <sub>1</sub> = 4°, FA <sub>2</sub> = 5°; R = 3; BWDTH = 240 Hz/px, ES = 7.1 ms |
| T <sub>2</sub> FLAIR | 176     | 256x256 | 1.0/1.0/1.0    | 6000/418                         | 8:50   | 3D, TI = 2100 ms; R = 2; BWDTH = 651 Hz/px, ES = 3.56 ms                                                                                   |

<sup>a</sup> For PET data, the dimensions describe the reconstructed standardized uptake value image. Abbreviations: 2D = 2-dimensional; 3D = 3-dimensional; AP = anterior-posterior; BWDTH = readout bandwidth; DW = diffusion weighted; EPI = echo-planar imaging; ES = echo spacing; FA = flip angle; T<sub>2</sub> FLAIR = T<sub>2</sub>-weighted fluid-attenuated inversion recovery; FOV = field of view; G = gradient strength; MB = multiband acceleration factor; MEMPRAGE = multi-echo magnetization-prepared rapid gradient echo; MP2RAGE = two inversion-contrast magnetization-prepared rapid acquisition gradient echo; N.A. = not applicable; pCASL = pseudo-continuous arterial-spin labeling; PE = phase encoding direction; R = in-plane acceleration factor; rs-fMRI = resting-state functional MRI; SMS = simultaneous multi-slice; SWI = susceptibility-weighted imaging; TE = echo time; TI = inversion time; TOF Angio = time-of-flight angiography; TR = repetition time.
